# Supplementary material
Source: PubMed Central journal article supplement (PMC3489920)
Supplement: NIHMS410236-supplement-1_si_001.pdf [file NIHMS410236-supplement-1_si_001.pdf]

# Supporting Information to:

## "Non-Fouling Poly(ethylene oxide) Layers End-Tethered to Polydopamine"

Ognen Pop-Georgievski,<sup>\*,†</sup> Dominique Verreault,<sup>‡</sup> Mark-Oliver Diesner,<sup>¶,§</sup>  
Vladimír Proks,<sup>†</sup> Stefan Heissler,<sup>||</sup> Patrick Koelsch,<sup>⊥</sup> and František Rypáček<sup>†</sup>

*Institute of Macromolecular Chemistry, Academy of Sciences of the Czech Republic, Heyrovsky Square 2, 162 06 Prague 6, Czech Republic, Department of Chemistry and Biochemistry, The Ohio State University, 100 West 18th Avenue, Columbus, OH 43210, USA, Institute of Toxicology and Genetics, Karlsruhe Institute of Technology (KIT), Hermann-von-Helmholtz-Platz 1, D-76344 Eggenstein-Leopoldshafen, Germany, Department of Molecular Evolution and Genomics, Center for Organismal Studies, University of Heidelberg, Im Neuenheimer Feld 230, D-69120 Heidelberg, Germany, Institute of Functional Interfaces, Karlsruhe Institute of Technology (KIT), Hermann-von-Helmholtz-Platz 1, D-76344 Eggenstein-Leopoldshafen, Germany, and National ESCA and Surface Analysis Center for Biomedical Problems, Department of Bioengineering, University of Washington, Box 35170, Seattle, WA 98195-1750, USA*

E-mail: georgievski@imc.cas.cz

---

<sup>\*</sup>To whom correspondence should be addressed

<sup>†</sup>Institute of Macromolecular Chemistry, Academy of Sciences of the Czech Republic

<sup>‡</sup>Department of Chemistry and Biochemistry, The Ohio State University

<sup>¶</sup>Institute of Toxicology and Genetics, Karlsruhe Institute of Technology

<sup>§</sup>Department of Molecular Evolution and Genomics, University of Heidelberg

<sup>||</sup>Institute of Functional Interfaces, Karlsruhe Institute of Technology

<sup>⊥</sup>Department of Bioengineering, University of Washington

## Radius of Gyration of Different PEO's

**Table S1:** Molecular weight ( $M_n$ ) of polymers used in this study, hydrodynamic radius ( $R_h$ ) determined by DLS, as well as calculated radius of gyration ( $R_g$ ) assuming random coiling of PEO chains in good solvent.

| <b>Abbreviation</b>        | $M_n$<br>[g/mol] | $R_h$<br>[nm] | $R_g^\dagger$<br>[nm] |
|----------------------------|------------------|---------------|-----------------------|
| PEO(2000)-SH               | 2015             | 1.4           | 2.5                   |
| PEO(2000)-NH <sub>2</sub>  | 1930             | 1.3           | 2.3                   |
| PEO(5000)-SH               | 5118             | 2.1           | 3.9                   |
| PEO(5000)-NH <sub>2</sub>  | 5079             | 2.1           | 3.7                   |
| PEO(10000)-SH              | 11153            | 3.3           | 5.9                   |
| PEO(10000)-NH <sub>2</sub> | 11065            | 3.3           | 5.9                   |
| PEO(20000)-SH              | 22271            | 4.1           | 7.3                   |
| PEO(20000)-NH <sub>2</sub> | 22359            | 4.2           | 7.5                   |

$^\dagger R_g = 1.78 \times R_h.$

## Covalent Structure of PDA

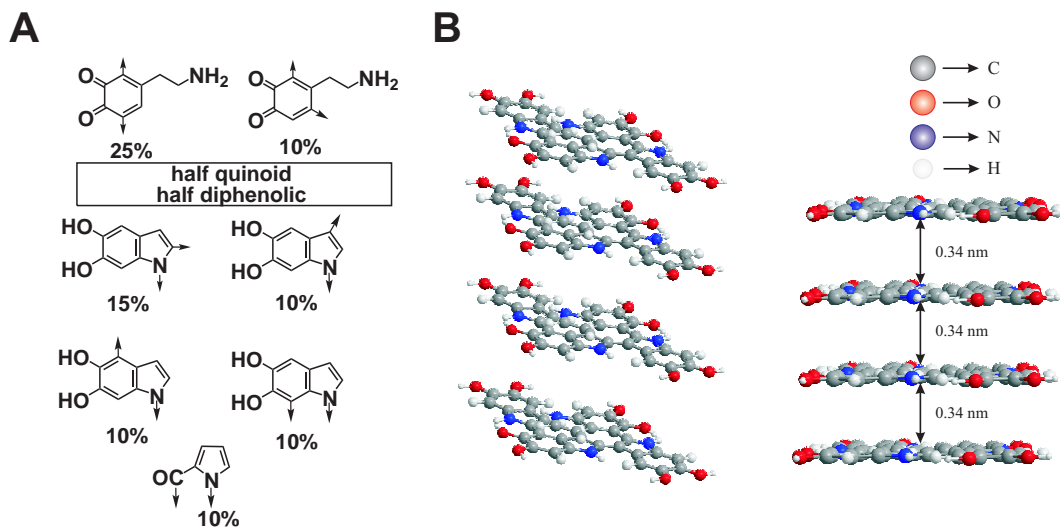

Scheme S1: Proposed covalent structure of PDA. (A) Model depicting PDA as a high molecular weight polymer made up of randomly linked monomer units.<sup>1,2</sup> (B) Model suggesting the ultrastructural organization of 4–5  $\pi$ -stacked oligomeric sheets.<sup>3,4</sup>

## Calculations of the Interpenetration Zone Thickness

The thickness of the interpenetration zone between PDA and PEO of different molecular weights was approximated by:<sup>5</sup>

$$I_{\text{thickness}} = \frac{2a}{\sqrt{6 \left[ \chi - 2 \ln 2 \left( \frac{1}{N_{\text{PDA}}} + \frac{1}{N_{\text{PEO}}} \right) \right]}}, \quad (\text{S.1})$$

where  $a$  is the geometric mean of PDA and PEO statistical segment lengths,  $N_{\text{PDA}}$  and  $N_{\text{PEO}}$  are the degrees of polymerization of PDA and PEO, respectively. Since  $N_{\text{PDA}}$  is not known *a priori*, it was set as a variable for the calculation of the interpenetration zone thickness.  $\chi$  is the Flory-Huggins interaction parameter of PDA and PEO, and is defined as:<sup>6</sup>

$$\chi = \frac{V_m (\delta_{\text{PDA}} - \delta_{\text{PEO}})^2}{RT}, \quad (\text{S.2})$$

where  $V_m$  is the molar volume taken as the geometric mean of PDA and PEO monomer units, while  $\delta_{\text{PDA}}$  and  $\delta_{\text{PEO}}$  are the solubility parameters of PDA and PEO, respectively.  $R$  is the universal gas constant and  $T$  is the temperature (in K) at which the grafting of PEO was performed. The molar volumes of the monomer units were estimated using "back-of-the-envelope" method,<sup>7</sup> whereas the solubility parameters were estimated using the atomic increment approach.<sup>8</sup> Calculated values of the solubility parameters were  $23.82 \text{ (J/cm}^{-3}\text{)}^{1/2}$  for PEO, and  $32.29 \text{ (J/cm}^{-3}\text{)}^{1/2}$  and  $\sim 35.40 \text{ (J/cm}^{-3}\text{)}^{1/2}$  for PDA having covalent structure of randomly linked monomer units (Scheme S1A)<sup>1,2</sup> and ultrastructural organization (Scheme S1B),<sup>3,4</sup> respectively. The obtained interpenetration zone thickness for the proposed models of the PDA covalent structure is reported in Figure S1.

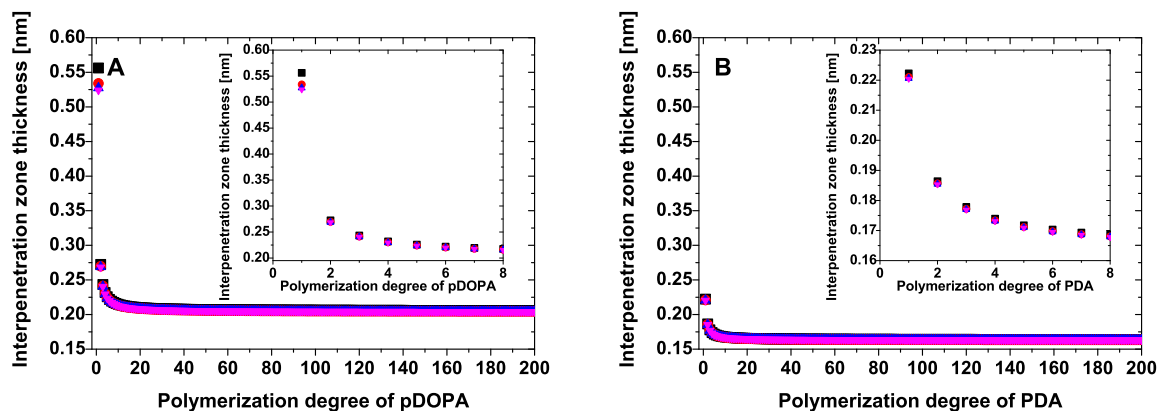

**Figure S1:** Variations of PEO/PDA interpenetration zone thickness for PDA having covalent structure of randomly linked monomer units (Scheme S1A) and ultrastructural organization (Scheme S1B). The thickness was calculated for PEO with different molecular weights: 2 000 (*black*), 5 000 (*red*), 10 000 (*blue*), and 20 000 (*pink*). Insets report the interpenetration zone thickness for low polymerization degrees of PDA.

## Ellipsometric Data on PEO Layer Thickness and Surface Chain Density

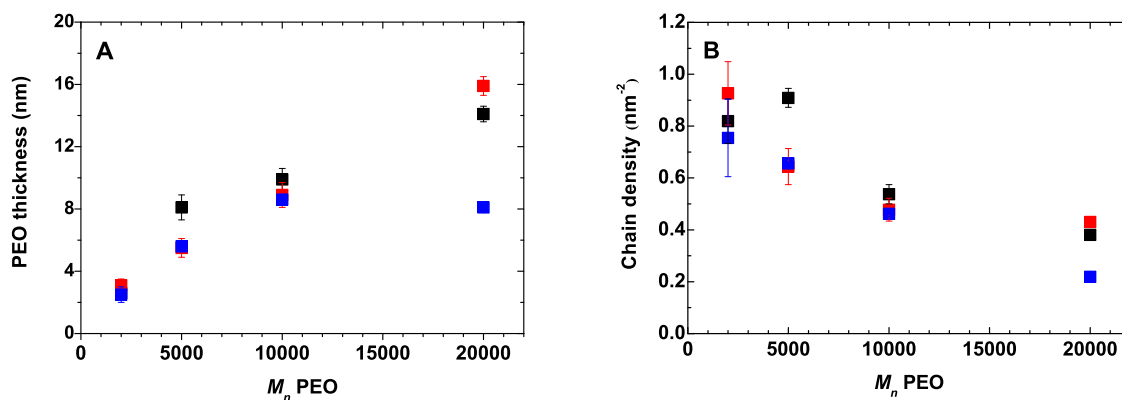

**Figure S2:** Variations of PEO (A) layer thickness and (B) surface chain density with increasing number average molecular weight of PEO. PEO-N(H)-PDA (*black*), PEO-S-PDA (*red*), and PEO-S (*blue*) anchoring on gold are shown. The thickness of the PDA film was  $\sim 11$  nm.

## VSFG Spectra of PDA Layer in the C–H Region in Air and in Water

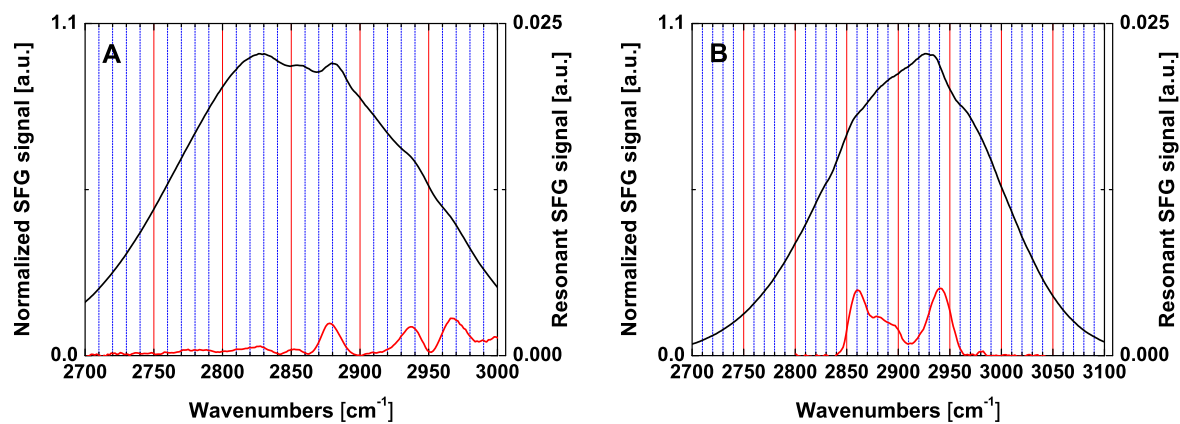

**Figure S3:** Measured (*black*) and delay-shifted (*red*) VSFG spectra in the CH stretching region of neat PDA films in air (A) and in H<sub>2</sub>O (B).

## Measured and delay-shifted VSFG Spectra of PEO-S-Au Layers in the C–H Region in Air

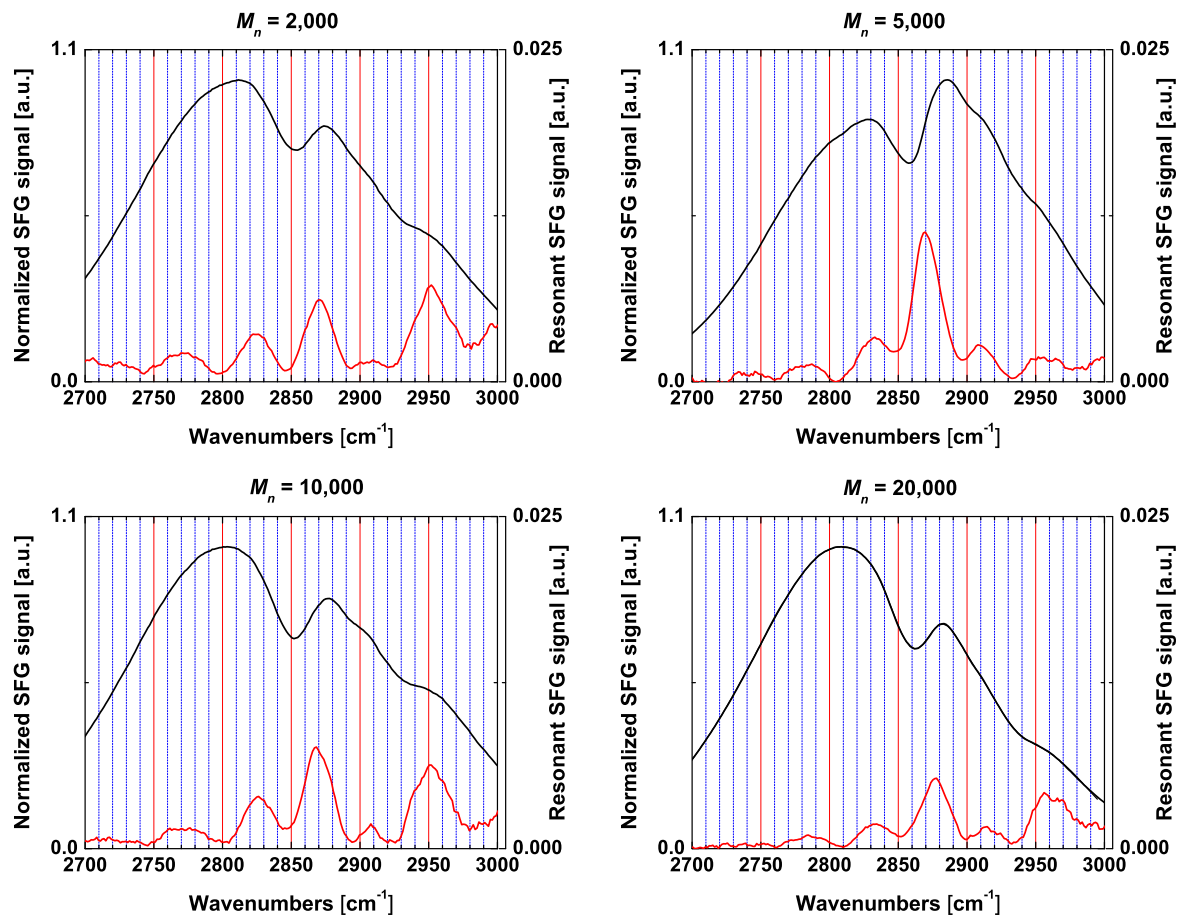

**Figure S4:** Measured (*black*) and delay-shifted (*red*) VSFG spectra in the C–H region of PEO-S-Au layers with different number average molecular weights: 2 000, 5 000, 10 000 and 20 000 in air.

## Measured and delay-shifted VSFG Spectra of PEO-S-Au Layers in the C–H Region in Water

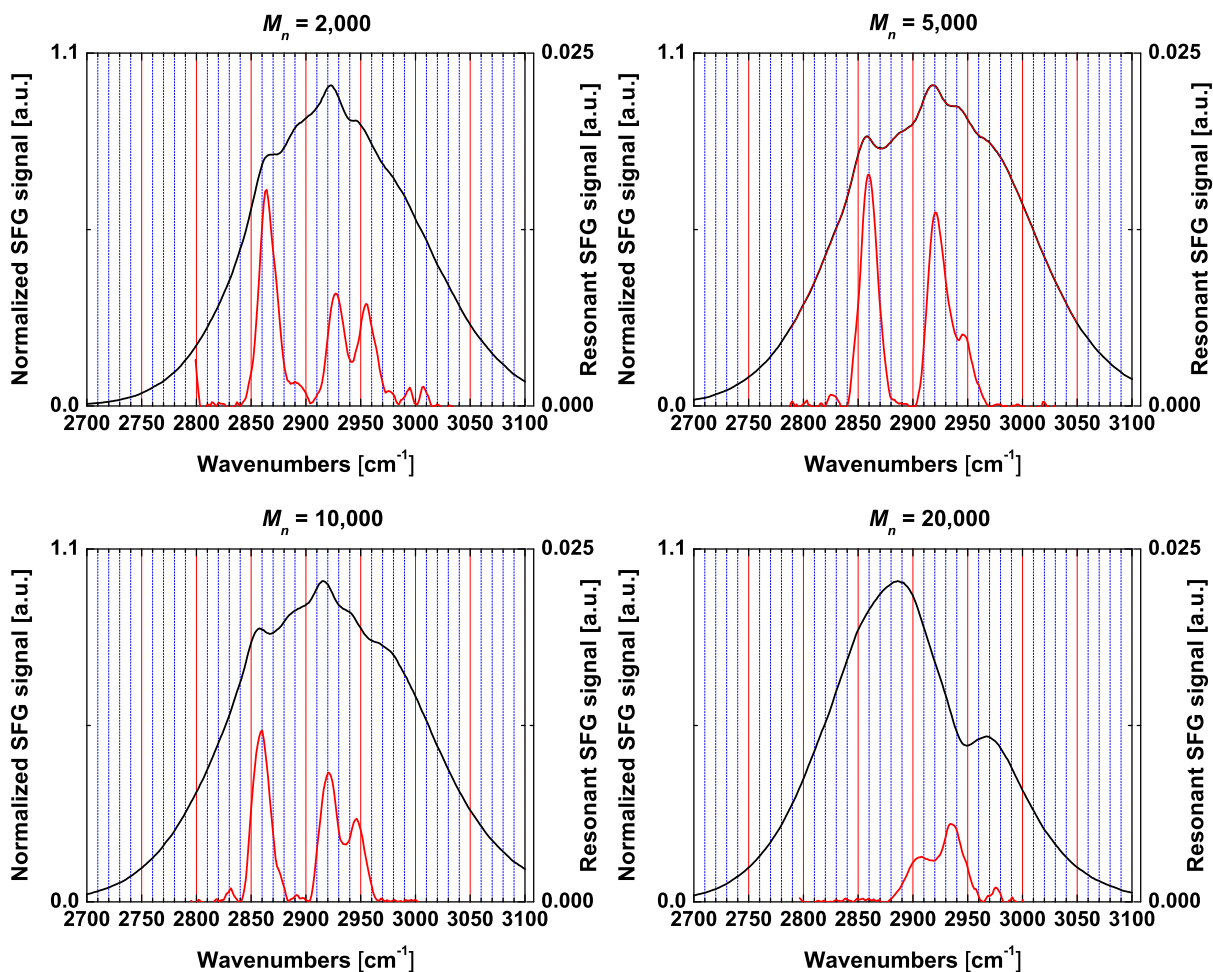

**Figure S5:** Measured (*black*) and delay-shifted (*red*) VSFG spectra in the C–H region of PEO-S-Au layers with different number average molecular weights: 2 000, 5 000, 10 000 and 20 000 in  $\text{H}_2\text{O}$ .



## REFERENCES

- (1) Binns, F.; King, J. A. G.; Mishra, S. N.; Percival, A.; Robson, N. C.; Swan, G. A.; Waggott, A. *J. Chem. Soc. C* **1970**, *15*, 2063–2070.
- (2) Nicolaus, R. A. In *Melanins*; Lederer, E., Ed.; Herman, 1968.
- (3) Watt, A. A. R.; Bothma, J. P.; Meredith, P. *Soft Matter* **2009**, *5*, 3754–3760.
- (4) d’Ischia, M.; Napolitano, M.; Pezzella, A.; Meredith, P.; Sarna, A.; Sarna, T. *Angew. Chem. Intl. Edit.* **2009**, *48*, 3914–3921.
- (5) Broseta, D.; Fredrickson, G. H.; Helfand, E.; Leibler, L. *Macromolecules* **1990**, *23*, 132–139.
- (6) Sperling, L. *Introduction to Physical Polymer Science*, 4th ed.; John Wiley and Sons: Hoboken, New Jersey, USA, 2006.
- (7) Girolami, G. S. *J. Chem. Educ.* **1994**, *71*, 962–964.
- (8) Askadskii, A. A. *Physical Properties of Polymers: Prediction and Control*; Gordon and Breach Publishers: Amsterdam, Netherlands, 1996.
